# Supplementary material for: Drivers of sex differences in Mycobacterium tuberculosis immunoreactivity among adolescents and adults in Blantyre, Malawi
Source: Research Square preprint supplement (doi:10.21203/rs.3.rs-8474694/v1), 2026-01-12
Supplement: Supplementary file 1 [file 681e2e6b787e09142f69fb8b.docx]

Drivers of sex differences in *Mycobacterium tuberculosis* immunoreactivity among adolescents and adults in Blantyre, Malawi

Authors

Mphatso D Phiri1,2,3,4 *, Hannah M Rickman1,5, Hannah Mbale1, Helena RA Feasey6, Marriott Nliwasa7,8, Alvaro Schwalb9,10,11, Tisungane E Mwenyenkulu12, Kuzani N Mbendera12, Henry C Mwandumba1,2,3, Elizabeth L Corbett5, S Bertel Squire2,3, Marc YR Henrion1,2,3, Katherine C Horton9,10, Peter MacPherson13

* Correspondence: Mphatso D Phiri ([mdphiri@mlw.mw](mailto:mdphiri@mlw.mw))

Supporting information includes:

1. Appendix A: Conceptual framework of individual-, household- and community-level risk factors *for Mycobacterium tuberculosis* (Mtb) exposure and infection
2. Appendix B: Model specification
3. Appendix C: Participant recruitment
4. Appendix D: Table S1: Predicted Mycobacterium tuberculosis (Mtb) immunoreactivity probabilities, by age and sex, male-to-female (M:F) ratios comparing predicted probabilities between males and females, and the posterior probability that M:F ratios exceeded 1 at each age.
5. Appendix E: Posterior probability of excess male risk in *Mycobacterium tuberculosis* immunoreactivity, comparing male-to-female (M:F) predicted probability ratios
6. Appendix F: Posterior sensitivity to weaker and stronger priors and likelihood
7. Appendix G: Model comparison, goodness of fit, regression coefficients and for models reported in the main text.

## Appendix A: Conceptual framework of individual-, household- and community-level risk factors for Mycobacterium tuberculosis (Mtb) exposure and infection


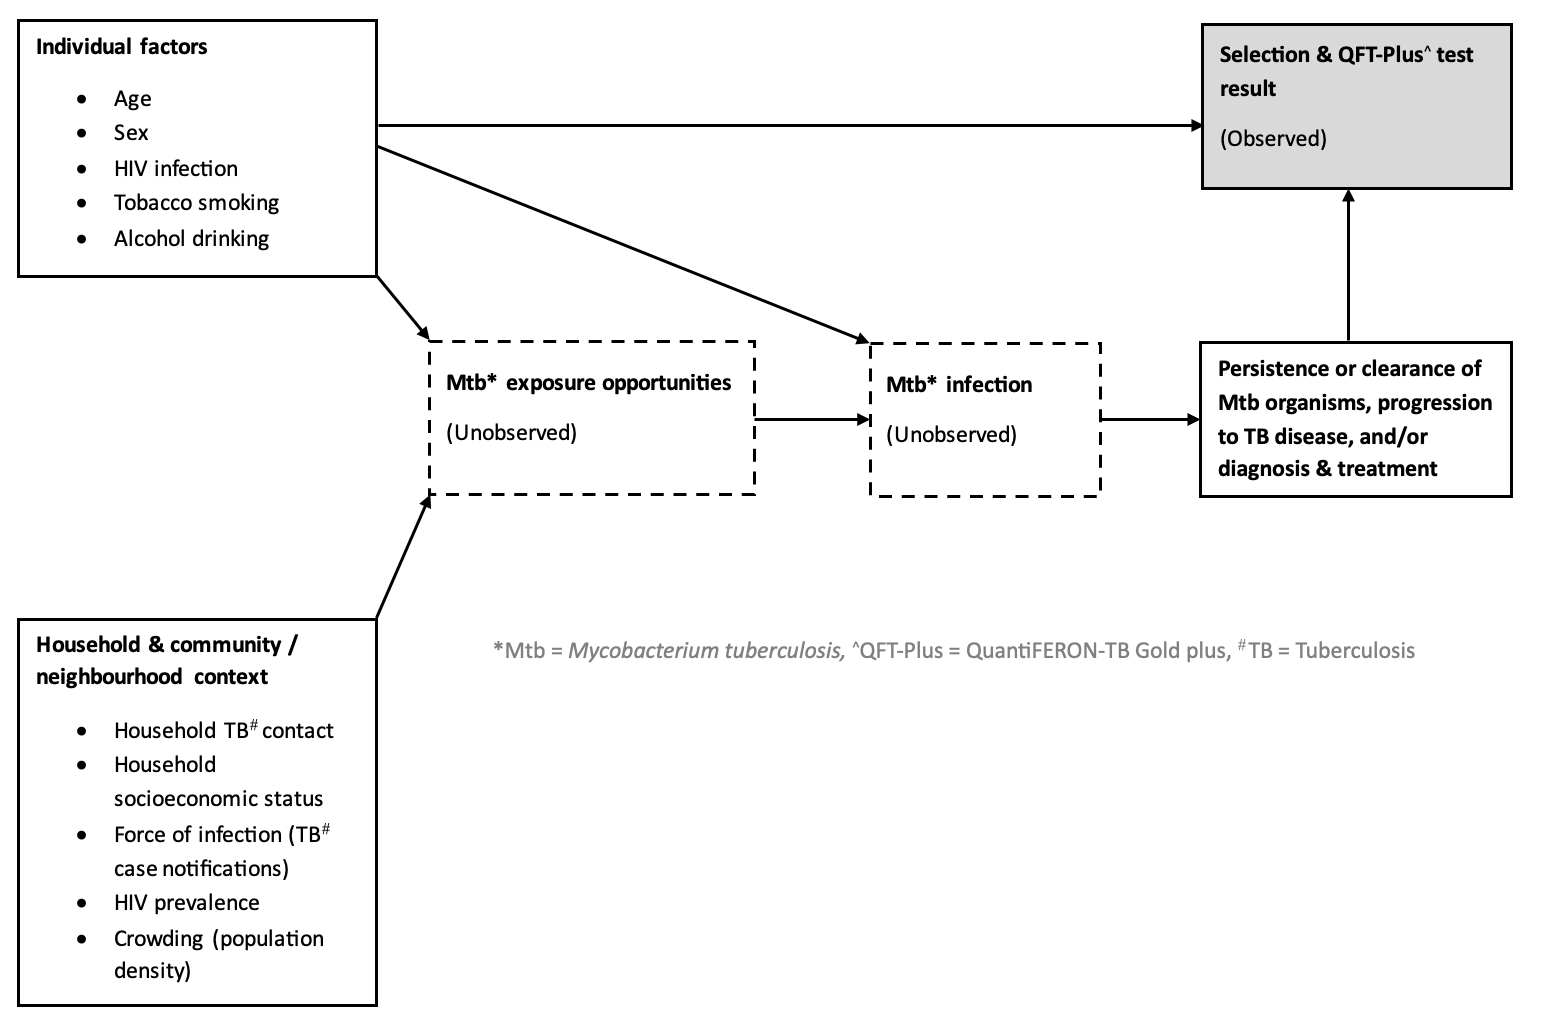


Figure S1: Conceptual framework of risk factors for *Mycobacterium tuberculosis* exposure and infection

Figure S1: Individual-, household- and community-level risk factors *for Mycobacterium tuberculosis* (Mtb) exposure and infection.

## Appendix B: Model specification

### “Base” model

Outcome: Mycobacterium tuberculosis (Mtb) immunoreactivity, defined as a positive QuantiFERON-TB Gold Plus test result. Mtb immunoreactivity probability for participant nested in neighbourhood was modelled as a Bernoulli outcome. The likelihood and link were:

The linear predictor comprises a sex-specific smooth of age and a neighbourhood-level random intercept.

The smooth function term for age and sex is specific as a spline basis of dimension , allowing different age curves by sex:

where are basis functions (thin-plate regression splines in implementation), the baseline smooth coefficients and the male-specific deviations. values were compared via leave-one-out cross-validation to identify an adequate spline basis dimension.

### “Full” model (adding individual & neighbourhood-level covariates)

We let represent individual-level covariates (HIV status, previous TB treatment, household TB contact, smoking, alcohol); membership in the poorest poverty quartile of households; all specified as binary variables, and neighbourhood -level covariates (2020 TB case notification rate (mean-centred), 2019 adult HIV prevalence, population density (mean-centred)), with corresponding coefficients . The full model extended the linear predictor as:

### Priors

Priors were weakly informative, specified as below, visualised via prior predictive checks to inspect their implied probabilities, and prior–data conflict and sensitivity were examined using the **priorsense** package v1.1.0:

- Intercept (logit scale) centred on a baseline prevalence of 20% in females:
- Population-level coefficients:
- Neighbourhood-level random-intercept standard deviation:
- Smooth (spline) standard deviations (brms class = sds, lower bounded at 0):

where is the SD of the neighbourhood random intercepts, and is the SD parameter governing the spline penalties. In brms, priors on SD parameters are constrained to be non-negative; thus the Student- prior on is implicitly half-.

### Estimation

Models were fitted in a Bayesian framework using Hamiltonian Monte Carlo via the brms (v2.22.0) interface to Stan in the R environment for statistical computing (v4.3.3). We run 4 chains with 2,000 iterations per chain (1,000 warm-up), yielding 4,000 post-warm-up draws. Convergence and mixing were assessed using , effective sample sizes, and visual inspection of trace plots. We set a conservative target acceptance probability (e.g., adapt_delta = 0.999) to avoid divergent transitions. Models were fitted in R v4.3.3 using the brms package v2.22.0, an interface to Stan v0.7.1 implementing Hamiltonian Monte Carlo.

### Posterior summaries and predictions

Posterior estimates are reported as posterior means and 95% credible intervals (CrIs; central 95% posterior percentiles). For age- and sex-specific inferences we calculated predictions, excluding neighbourhood-level random effects by setting (population-level predictions).

### Annual risk of Mtb immunoreactivity conversion (ARC)

Let denote the predicted probability of immunoreactivity at age and sex . The **annual risk of conversion (ARC)** at age was defined as:

To quantify sex differences we computed **male-to-female (M:F) ratios** of predicted probabilities

and ARCs at each age:

The **posterior probability of excess male risk** was reported as , computed as the proportion of posterior draws where the ratio exceeded 1 (with Monte Carlo standard error).

### Interpretation

We exponentiated logit scale fixed-effect coefficients to obtain odds ratios. Nonlinear age effects are obtained from probabilities obtained via the logit-inverse function to the odds; uncertainty in both the smooth and random effects is propagated through all posterior summaries.

## Appendix C: Participant recruitment


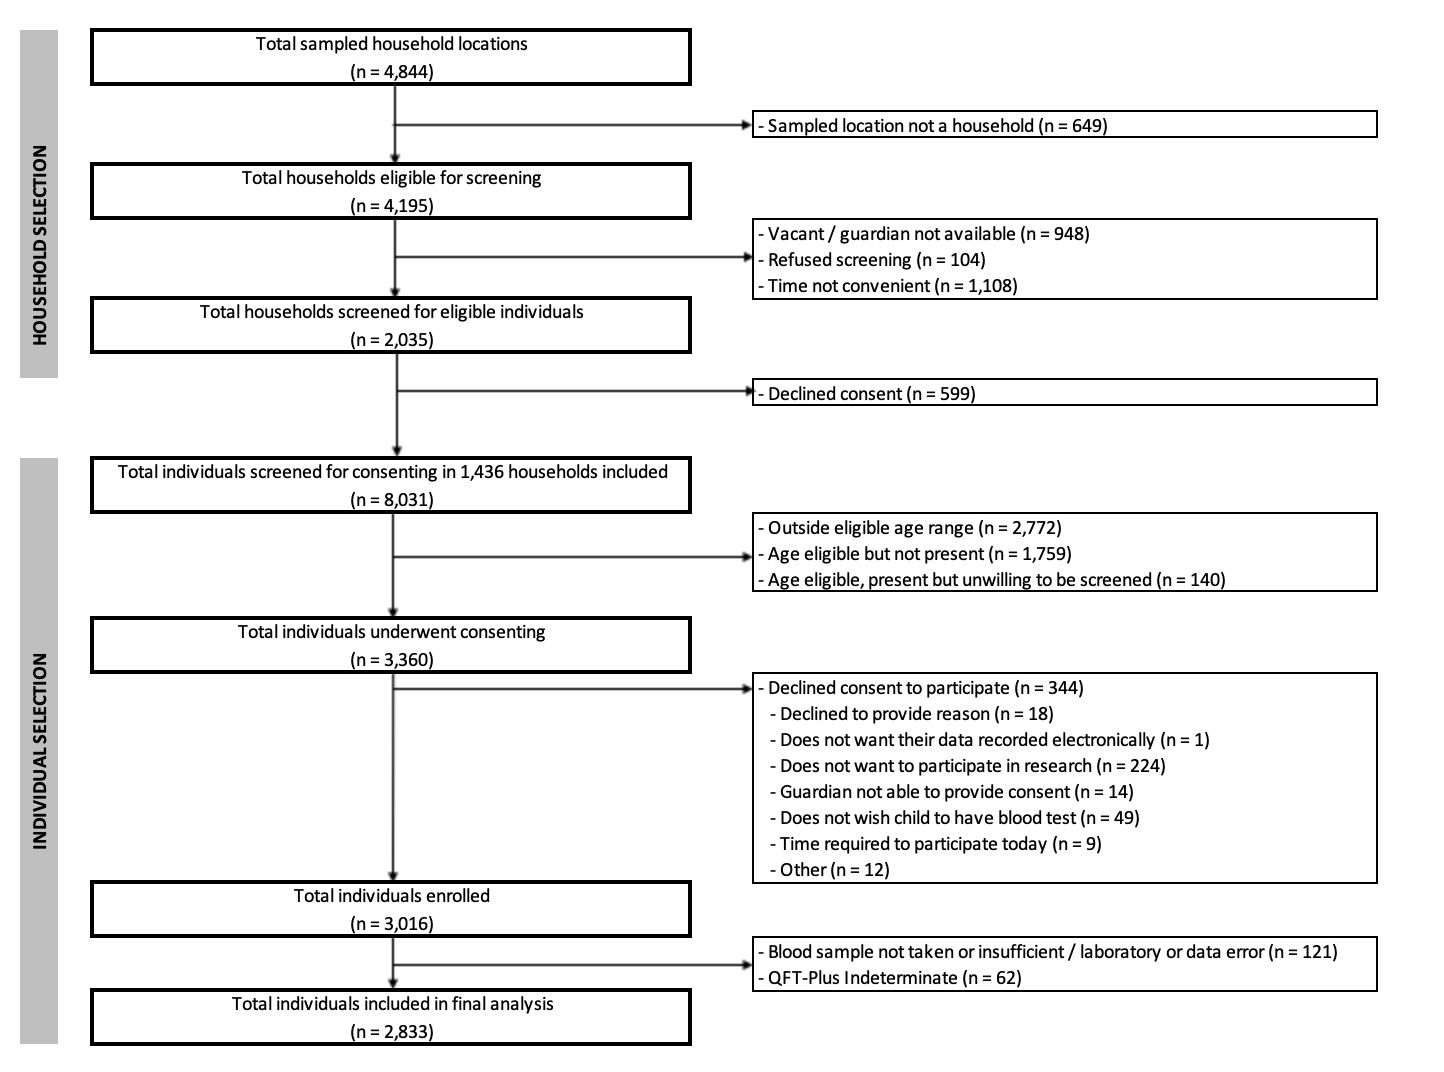


Figure S2: Participant recruitment

## Appendix D: Mycobacterium tuberculosis immunoreactivity probabilities and male-to-female ratios

**Table S1:** Predicted *Mycobacterium tuberculosis* (Mtb) immunoreactivity probabilities, by age and sex, male-to-female (M:F) ratios comparing predicted probabilities between males and females, and the posterior probability that M:F ratios exceeded 1 at each age.

| **Age (years)** | **Predicted probability of Mtb immunoreactivity1 (%)** | | **M:F2 probability ratio**  **(95% CrI)** | **Posterior probability3 that M:F ratio exceeded 1** | **MCSE4 of posterior probability M:F > 1** |
| --- | --- | --- | --- | --- | --- |
|  | **Male** | **Female** |  |  |  |
| 10 | 6.2% (3.9%-9.1%) | 8.5% (5.7%-11.8%) | 0.74 (0.44-1.18) | 9.9% | 0.0052 |
| 11 | 6.9% (4.6%-9.6%) | 9.1% (6.4%-12.2%) | 0.77 (0.49-1.14) | 9.3% | 0.0049 |
| 12 | 7.6% (5.4%-10.2%) | 9.8% (7.2%-12.6%) | 0.79 (0.55-1.11) | 8.6% | 0.0046 |
| 13 | 8.5% (6.3%-10.9%) | 10.5% (8.1%-13.1%) | 0.82 (0.60-1.09) | 7.8% | 0.0044 |
| 14 | 9.4% (7.4%-11.7%) | 11.2% (9.0%-13.6%) | 0.85 (0.67-1.06) | 7.2% | 0.0043 |
| 15 | 10.4% (8.5%-12.5%) | 11.9% (9.9%-14.2%) | 0.88 (0.73-1.05) | 7.1% | 0.0045 |
| 16 | 11.5% (9.8%-13.5%) | 12.7% (10.9%-14.8%) | 0.91 (0.79-1.04) | 7.8% | 0.0050 |
| 17 | 12.7% (11.0%-14.6%) | 13.6% (11.8%-15.5%) | 0.94 (0.83-1.05) | 12.6% | 0.0061 |
| 18 | 13.9% (12.2%-15.9%) | 14.4% (12.7%-16.3%) | 0.97 (0.87-1.08) | 26.2% | 0.0074 |
| 19 | 15.2% (13.2%-17.4%) | 15.3% (13.5%-17.2%) | 0.99 (0.88-1.12) | 45.8% | 0.0083 |
| 20 | 16.5% (14.2%-19.0%) | 16.2% (14.3%-18.3%) | 1.02 (0.89-1.17) | 60.2% | 0.0087 |
| 21 | 17.8% (15.1%-20.7%) | 17.1% (15.0%-19.4%) | 1.05 (0.89-1.22) | 68.8% | 0.0091 |
| 22 | 19.1% (16.1%-22.4%) | 17.9% (15.7%-20.5%) | 1.07 (0.89-1.27) | 74.4% | 0.0091 |
| 23 | 20.4% (17.1%-24.1%) | 18.8% (16.4%-21.5%) | 1.09 (0.89-1.31) | 78.8% | 0.0087 |
| 24 | 21.6% (18.0%-25.7%) | 19.6% (17.1%-22.6%) | 1.11 (0.90-1.34) | 81.8% | 0.0079 |
| 25 | 22.8% (18.9%-27.1%) | 20.4% (17.7%-23.6%) | 1.12 (0.90-1.36) | 83.9% | 0.0072 |
| 26 | 23.9% (19.9%-28.4%) | 21.2% (18.4%-24.5%) | 1.13 (0.91-1.38) | 86.2% | 0.0066 |
| 27 | 24.9% (20.8%-29.5%) | 22.0% (19.1%-25.2%) | 1.14 (0.92-1.38) | 87.8% | 0.0062 |
| 28 | 25.8% (21.8%-30.4%) | 22.7% (19.8%-25.9%) | 1.14 (0.93-1.38) | 89.9% | 0.0053 |
| 29 | 26.6% (22.6%-31.2%) | 23.3% (20.4%-26.6%) | 1.15 (0.94-1.37) | 91.6% | 0.0045 |
| 30 | 27.4% (23.3%-31.9%) | 23.9% (21.0%-27.2%) | 1.15 (0.95-1.37) | 92.8% | 0.0043 |
| 31 | 28.0% (23.8%-32.6%) | 24.5% (21.6%-27.6%) | 1.15 (0.96-1.36) | 92.8% | 0.0045 |
| 32 | 28.6% (24.2%-33.4%) | 25.0% (22.1%-28.1%) | 1.14 (0.95-1.36) | 92.2% | 0.0050 |
| 33 | 29.0% (24.3%-34.3%) | 25.5% (22.5%-28.8%) | 1.14 (0.93-1.37) | 90.1% | 0.0055 |
| 34 | 29.5% (24.1%-35.3%) | 26.0% (22.7%-29.5%) | 1.14 (0.91-1.39) | 86.8% | 0.0061 |
| 35 | 29.8% (23.8%-36.3%) | 26.5% (22.8%-30.3%) | 1.13 (0.88-1.42) | 82.7% | 0.0068 |
| 36 | 30.1% (23.3%-37.5%) | 26.9% (22.7%-31.2%) | 1.13 (0.84-1.45) | 78.4% | 0.0070 |
| 37 | 30.4% (22.7%-38.9%) | 27.3% (22.6%-32.3%) | 1.12 (0.80-1.49) | 74.0% | 0.0073 |
| 38 | 30.7% (21.9%-40.2%) | 27.7% (22.4%-33.4%) | 1.12 (0.76-1.54) | 70.0% | 0.0076 |
| 39 | 30.9% (21.1%-41.9%) | 28.2% (22.1%-34.6%) | 1.11 (0.72-1.59) | 66.8% | 0.0078 |
| 40 | 31.2% (20.4%-43.4%) | 28.6% (21.8%-35.8%) | 1.11 (0.68-1.65) | 63.6% | 0.0078 |

1. Mtb: *Mycobacterium tuberculosis* (Mtb) immunoreactivity probability predicted from a model adjusted for age and sex, with age specified via a thin-plate regression spline function, separately for each sex. Mtb immunoreactivity was defined as a positive QFT-Plus test.
2. M:F: ratio comparing predicted Mtb immunoreactivity probability between males and females
3. The proportion of M:F ratios that exceeded 1 across 4,000 posterior draws, expressed as a percentage. M:F exceeding 1 denotes excess male risk, and excess female risk below 1.
4. Monte Carlo standard error of the proportion of posterior M:F ratios exceeding 1.

## Appendix E: Posterior probability of excess male risk in *Mycobacterium tuberculosis* immunoreactivity, comparing male-to-female (M:F) predicted probability ratios


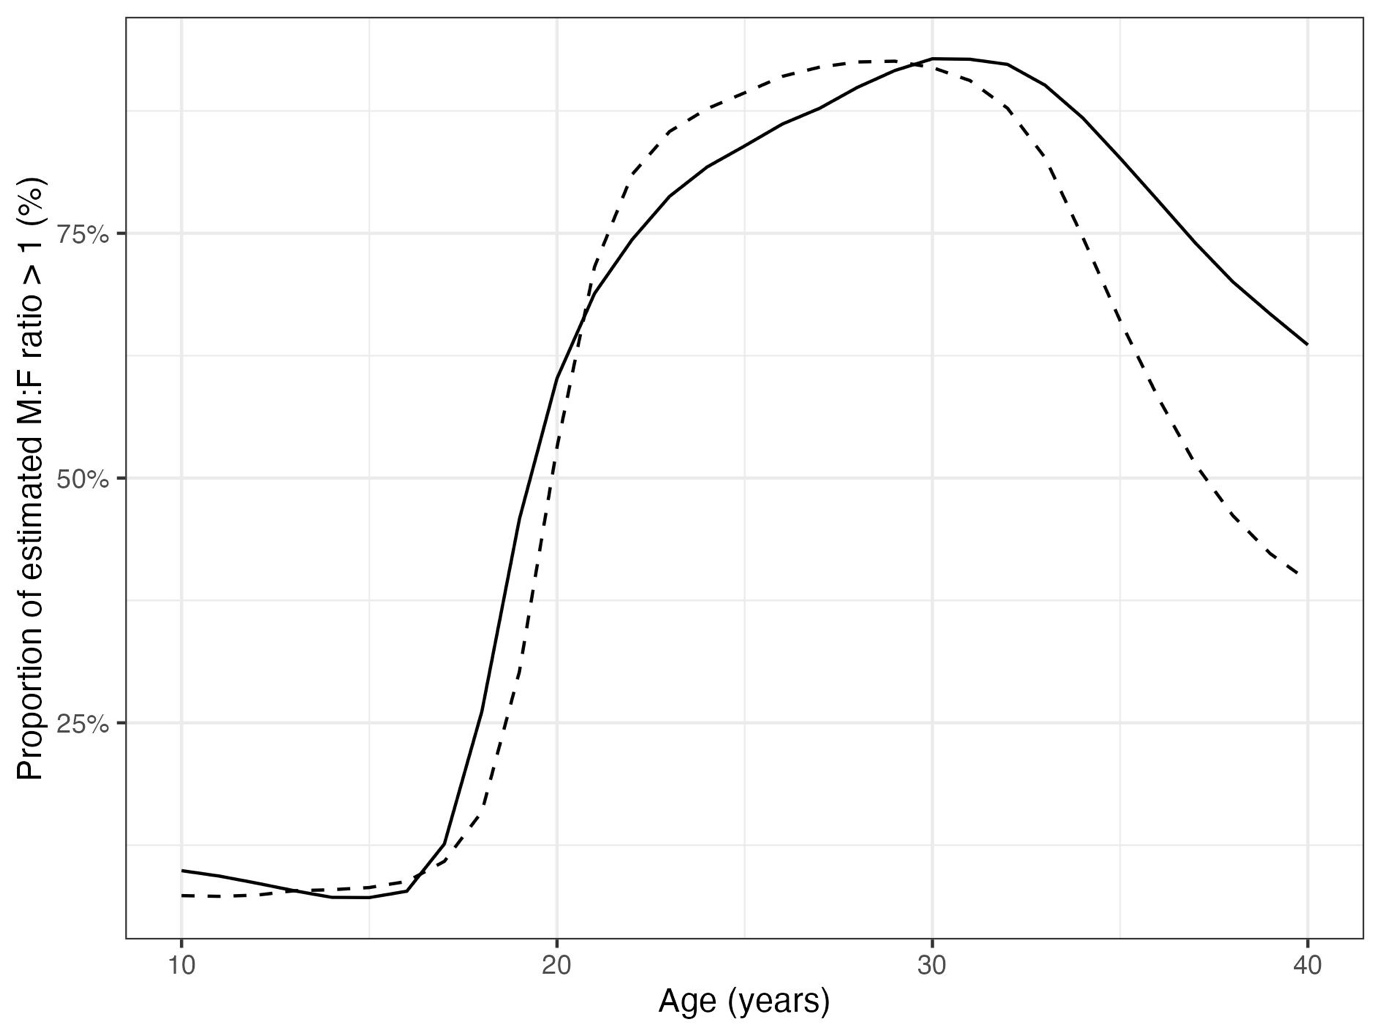


**Figure S3**: Posterior probability that male-to-female (M:F) ratio of Mtb immunoreactivity probability exceed 1 across age. Probabilities were predicted from a Bayesian logistical regression model of Mtb immunoreactivity additionally adjusted for age, sex and a neighbourhood level random effect, but predictions excluded random effects. M:F ratios were calculated at each posterior draw. Mtb immunoreactivity was defined as a positive QFT-Plus test. Posterior probability is the proportion of M:F ratios exceeding 1 across 4,000 draws. Solid lines are predictions from a model fitted to both HIV negative and HIV positive participants. Dashes lines are predictions from a model fitted to HIV negative participants only.

## Appendix F: Posterior sensitivity to weaker and stronger priors and likelihood


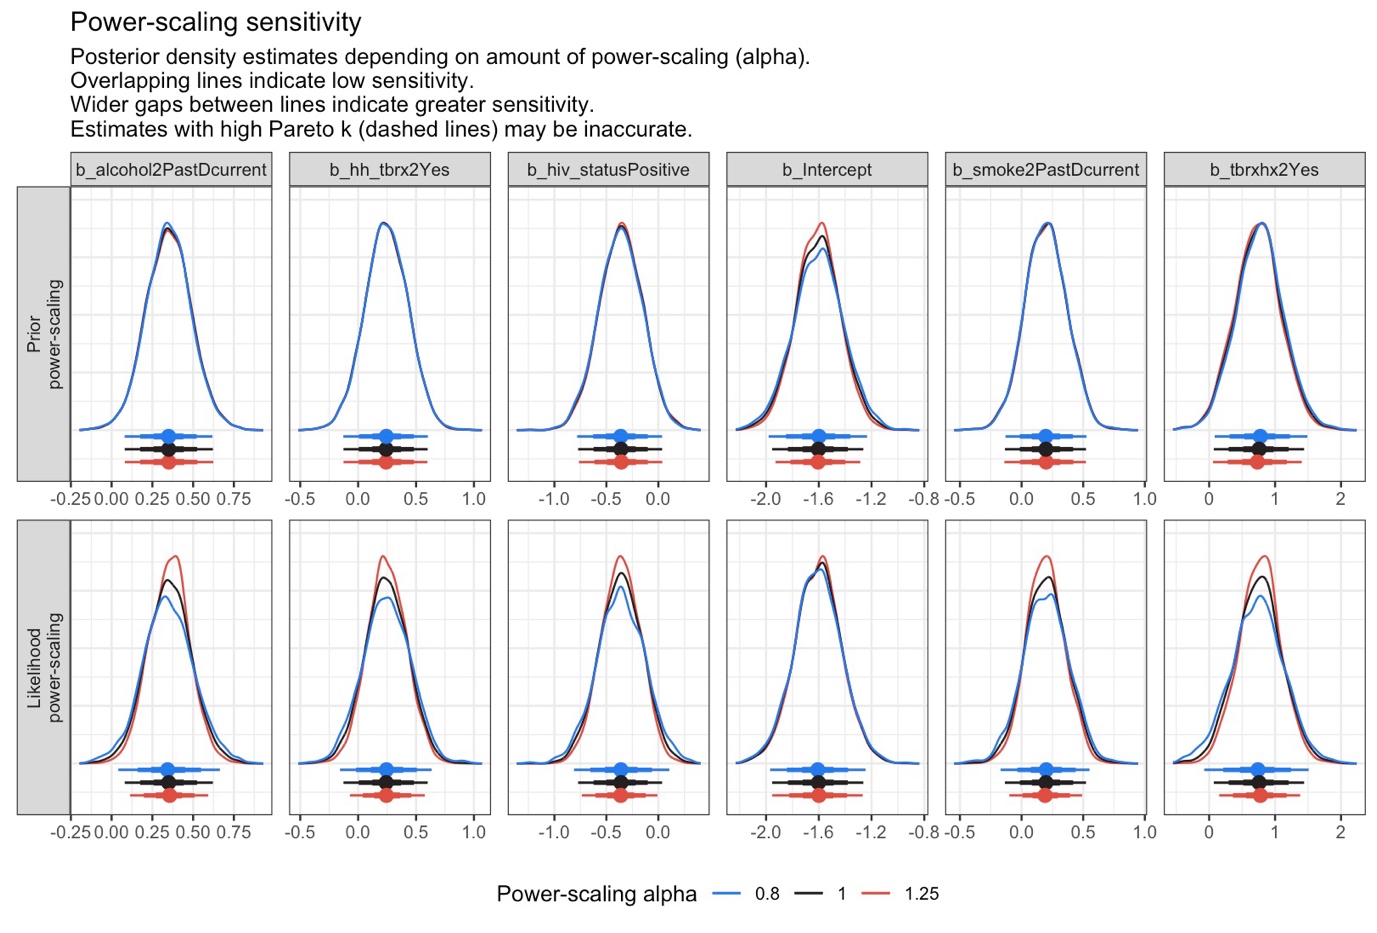


**Figure S4**: Density plots showing model posterior sensitivity to weaker and stronger priors and likelihood for fixed model effects. Plots are outputs from the priorsense R package.

## Appendix G: Model comparison, goodness of fit, regression coefficients and for models reported in the main text.

### Models and covariates

Several multilevel Bayesian logistic regression models were fitted to estimate the odds of Mtb immunoreactivity. Covariates included individual variables: age (integer years); sex (male/female); HIV status (positive/negative), previous TB treatment, household TB contact, (as indicator variables: (yes/no); and any lifetime smoking, and any lifetime alcohol drinking (as indicator variables: (“past or current”/never); household variables: membership in the poorest quartile of households (yes/no); and neighbourhood variables: 2019 neighbourhood adult HIV prevalence, 2020 neighbourhood TB case notification rates (mean scaled), and neighbourhood population density (mean scaled). Age was specified via a thin-plate regression spline function, for each sex. Αll models included a neighbourhood random effect to account for the cluster household sampling.

### Spline specification for age variable

Models with age specified as a continuous, 5- or 10-year group variable (age_5y or age_10_y), or as an integer via a thin-plate spline function (spline_k3, …, spline_k6), were compared via leave-one-out cross-validation.

| model | elpd_diff | se_diff | elpd_loo | se_elpd_loo | p_loo | se_p_loo | looic | se_looic |
| --- | --- | --- | --- | --- | --- | --- | --- | --- |
| spline_k3 | 0.00 | 0.00 | -1277.59 | 31.2 | 8.95 | 0.3 | 2555.18 | 62.4 |
| age_10y | -9.38 | 3.98 | -1286.97 | 31.3 | 8.8 | 0.28 | 2573.94 | 62.6 |
| age_5y | -6.00 | 2.27 | -1283.58 | 31.18 | 11.97 | 0.38 | 2567.17 | 62.36 |
| continuous | -4.75 | 3.07 | -1282.34 | 31.21 | 7.74 | 0.25 | 2564.68 | 62.43 |
| spline_k5 | -1.49 | 1.29 | -1279.08 | 31.11 | 9.47 | 0.31 | 2558.16 | 62.21 |
| spline_k4 | -1.43 | 1.26 | -1279.01 | 31.09 | 9.07 | 0.3 | 2558.03 | 62.17 |
| spline_k6 | -0.79 | 0.79 | -1278.38 | 31.18 | 9.92 | 0.33 | 2556.76 | 62.36 |

### Covariate selection and model comparison

Models were adjusted for age and sex *a priori*, and included different sets of variables, as follows:

1. m0_age_sex : age (integer years) and sex (male/female).
2. m1_full: m0_age_sex additionally adjusted for HIV status (positive/negative), previous TB treatment, household TB contact, (as indicator variables: (yes/no); and any lifetime smoking, and any lifetime alcohol drinking (as indicator variables: (“past or current”/never)
3. m1_full_popdens: m1_full additionally adjusted for neighbourhood population density
4. m1_full_cluster_pov: m1_full additionally adjusted for membership in the poorest quartile of households.
5. m1_full_cnr: m1_full additional adjusted for neighbourhood TB case notification rates
6. m1_full_cluster_hiv: m1_full additionally adjusted for neighbourhood adult HIV prevalence.
7. m2_full: m1_full additionally adjusted for neighbourhood adult HIV prevalence, neighbourhood TB case notification rates, and neighbourhood population density.

### Model comparison

Table below shows model comparison statistics for fitted models.

| model | looic | looic_se | p_loo | se_p_loo | elpd_diff | se_diff |
| --- | --- | --- | --- | --- | --- | --- |
| m1_full_popdens | 1960.7 | 50.5 | 14.4 | 0.6 | 0.0 | 0.0 |
| m1_full_cnr | 1964.9 | 50.5 | 15.6 | 0.6 | -2.1 | 2.1 |
| m2_full | 1965.3 | 50.7 | 17.6 | 0.7 | -2.3 | 0.9 |
| m1_full_cluster_hiv | 1965.4 | 50.3 | 15.3 | 0.6 | -2.3 | 2.4 |
| m1_full | 1966 | 50.3 | 15.4 | 0.6 | -2.6 | 2.4 |
| m1_full_pov | 1967.4 | 50.4 | 16.3 | 0.6 | -3.3 | 2.5 |

Full model regression coefficients (log scale) are presented below. For each model, mean, sd, q2.5 and q97.54 are presented up to 4 decimal points, and ess_bulk and ess_tail are rounded to whole number.

| model | variable | mean | sd | q2.5 | q97.5 | rhat | ess_bulk | ess_tail |
| --- | --- | --- | --- | --- | --- | --- | --- | --- |
| m0_age_sex | b_Intercept | -1.6041 | 0.0579 | -1.7196 | -1.4901 | 1.0011 | 3905 | 2797 |
| m0_age_sex | bs_sage:sexFemale_1 | 0.3990 | 0.0630 | 0.2749 | 0.5226 | 0.9995 | 4485 | 3203 |
| m0_age_sex | bs_sage:sexMale_1 | 0.5279 | 0.0866 | 0.3565 | 0.6995 | 1.0014 | 5303 | 2646 |
| m0_age_sex | sd_cluster__Intercept | 0.1032 | 0.0703 | 0.0045 | 0.2532 | 1.0052 | 1288 | 1923 |
| m0_age_sex | sds_sagesexFemale_1 | 2.1744 | 1.9882 | 0.1309 | 7.1894 | 1.0011 | 2020 | 1713 |
| m0_age_sex | sds_sagesexMale_1 | 3.0920 | 2.6811 | 0.4043 | 9.8916 | 1.0004 | 2015 | 1533 |
| m0_age_sex | Intercept | -1.6041 | 0.0579 | -1.7196 | -1.4901 | 1.0011 | 3905 | 2797 |
| m0_age_sex | s_sagesexFemale_1[1] | 1.2993 | 0.9586 | -0.2292 | 3.2481 | 1.0023 | 2585 | 2131 |
| m0_age_sex | s_sagesexMale_1[1] | 2.4370 | 1.3038 | 0.0295 | 4.9491 | 1.0005 | 2570 | 1432 |
| m1_full | b_Intercept | -1.6050 | 0.0846 | -1.7744 | -1.4436 | 1.0006 | 4745 | 3078 |
| m1_full | b_hiv_statusPositive | -0.3604 | 0.2091 | -0.7787 | 0.0404 | 1.0007 | 5626 | 3088 |
| m1_full | b_smoke2PastDcurrent | 0.2148 | 0.1744 | -0.1324 | 0.5409 | 1.0029 | 5848 | 3105 |
| m1_full | b_alcohol2PastDcurrent | 0.3381 | 0.1361 | 0.0775 | 0.6036 | 1.0019 | 4691 | 3109 |
| m1_full | b_tbrxhx2Yes | 0.7749 | 0.3579 | 0.0824 | 1.4710 | 1.0010 | 6615 | 3440 |
| m1_full | b_hh_tbrx2Yes | 0.2572 | 0.1851 | -0.1151 | 0.6126 | 1.0006 | 5810 | 3383 |
| m1_full | bs_sage:sexFemale_1 | 0.3899 | 0.0828 | 0.2296 | 0.5582 | 1.0017 | 5283 | 3185 |
| m1_full | bs_sage:sexMale_1 | 0.4168 | 0.1070 | 0.2054 | 0.6267 | 1.0014 | 5877 | 2800 |
| m1_full | sd_cluster__Intercept | 0.1326 | 0.0868 | 0.0056 | 0.3235 | 1.0013 | 1315 | 2015 |
| m1_full | sds_sagesexFemale_1 | 1.8971 | 1.9514 | 0.0757 | 6.9557 | 1.0008 | 2492 | 2065 |
| m1_full | sds_sagesexMale_1 | 2.6811 | 2.3896 | 0.1552 | 9.4623 | 1.0030 | 2020 | 1294 |
| m1_full | Intercept | -1.4515 | 0.0682 | -1.5865 | -1.3189 | 1.0002 | 4365 | 2783 |
| m1_full | s_sagesexFemale_1[1] | 0.9474 | 0.9605 | -0.498 | 3.1063 | 1.0001 | 2862 | 2991 |
| m1_full | s_sagesexMale_1[1] | 1.9540 | 1.4361 | -0.3232 | 4.9086 | 1.0031 | 2474 | 2457 |
| m1_full_popdens | b_Intercept | -1.6127 | 0.0820 | -1.7760 | -1.4538 | 1.0020 | 4458 | 3244 |
| m1_full_popdens | b_hiv_statusPositive | -0.3433 | 0.2116 | -0.7679 | 0.0562 | 1.0006 | 5189 | 2954 |
| m1_full_popdens | b_smoke2PastDcurrent | 0.2068 | 0.1727 | -0.1407 | 0.5419 | 1.0007 | 3885 | 2875 |
| m1_full_popdens | b_alcohol2PastDcurrent | 0.3461 | 0.1390 | 0.0689 | 0.6129 | 1.0008 | 3730 | 2879 |
| m1_full_popdens | b_tbrxhx2Yes | 0.7455 | 0.3658 | 0.0299 | 1.4771 | 1.0006 | 4071 | 2838 |
| m1_full_popdens | b_hh_tbrx2Yes | 0.2492 | 0.1877 | -0.1310 | 0.6116 | 1.0000 | 4163 | 2955 |
| m1_full_popdens | b_pop_dens_km2_std | 0.1626 | 0.0611 | 0.0448 | 0.2849 | 1.0002 | 4481 | 3210 |
| m1_full_popdens | bs_sage:sexFemale_1 | 0.3932 | 0.0852 | 0.2276 | 0.5676 | 1.0015 | 3801 | 3061 |
| m1_full_popdens | bs_sage:sexMale_1 | 0.4253 | 0.1071 | 0.2249 | 0.6420 | 1.0008 | 4211 | 2579 |
| m1_full_popdens | sd_cluster__Intercept | 0.1035 | 0.0726 | 0.0049 | 0.2699 | 1.0027 | 1408 | 1924 |
| m1_full_popdens | sds_sagesexFemale_1 | 1.9643 | 2.0563 | 0.0622 | 6.9846 | 1.0031 | 1737 | 1210 |
| m1_full_popdens | sds_sagesexMale_1 | 2.7011 | 2.5854 | 0.1195 | 9.1112 | 1.0002 | 1681 | 1077 |
| m1_full_popdens | Intercept | -1.4591 | 0.0638 | -1.5846 | -1.3336 | 1.0015 | 3979 | 3255 |
| m1_full_popdens | s_sagesexFemale_1[1] | 1.0144 | 0.9732 | -0.5286 | 3.1745 | 1.0016 | 2501 | 3367 |
| m1_full_popdens | s_sagesexMale_1[1] | 1.8888 | 1.3845 | -0.2665 | 4.7994 | 1.0009 | 1868 | 2684 |
| m2_full | b_Intercept | -1.6051 | 0.1760 | -1.9543 | -1.2619 | 1.0019 | 5594 | 3009 |
| m2_full | b_hiv_statusPositive | -0.3605 | 0.2062 | -0.7733 | 0.0363 | 1.0019 | 5891 | 3127 |
| m2_full | b_smoke2PastDcurrent | 0.1984 | 0.1686 | -0.1353 | 0.5234 | 1.0008 | 3775 | 3314 |
| m2_full | b_alcohol2PastDcurrent | 0.3509 | 0.1380 | 0.0800 | 0.6217 | 1.0005 | 3736 | 2880 |
| m2_full | b_tbrxhx2Yes | 0.7524 | 0.3537 | 0.0699 | 1.4414 | 1.0019 | 5205 | 3202 |
| m2_full | b_hh_tbrx2Yes | 0.2447 | 0.1843 | -0.1271 | 0.6008 | 1.0015 | 4804 | 3229 |
| m2_full | b_poorest_quartileYes | 0.0625 | 0.1270 | -0.1790 | 0.3136 | 1.0008 | 5659 | 3262 |
| m2_full | b_cnr_std | 0.0237 | 0.0699 | -0.1092 | 0.1592 | 1.0005 | 3565 | 3239 |
| m2_full | b_cluster_hiv_prev | -0.1692 | 0.9549 | -2.0243 | 1.7531 | 1.0035 | 5981 | 2921 |
| m2_full | b_pop_dens_km2_std | 0.1492 | 0.0728 | 0.0089 | 0.2885 | 1.0008 | 3244 | 3083 |
| m2_full | bs_sage:sexFemale_1 | 0.4005 | 0.0822 | 0.2413 | 0.5603 | 1.0004 | 4170 | 3062 |
| m2_full | bs_sage:sexMale_1 | 0.4270 | 0.1059 | 0.2203 | 0.6338 | 1.0017 | 5033 | 3268 |
| m2_full | sd_cluster__Intercept | 0.1071 | 0.0762 | 0.0040 | 0.2846 | 1.0025 | 1433 | 1694 |
| m2_full | sds_sagesexFemale_1 | 1.9847 | 2.1157 | 0.0734 | 6.8834 | 1.0010 | 1843 | 2082 |
| m2_full | sds_sagesexMale_1 | 2.6714 | 2.6620 | 0.1556 | 9.4086 | 1.0001 | 1866 | 1329 |
| m2_full | Intercept | -1.4624 | 0.0654 | -1.5902 | -1.3317 | 1.0010 | 4266 | 2959 |
| m2_full | s_sagesexFemale_1[1] | 1.0090 | 0.9746 | -0.5042 | 3.1408 | 1.0000 | 2308 | 3470 |
| m2_full | s_sagesexMale_1[1] | 1.8858 | 1.4114 | -0.3362 | 4.8188 | 1.0002 | 2015 | 2130 |
